# Supplementary material for: Exclusive confinement of Bi3+-activators in the triangular prism enabling efficient and thermally stable green emission in the tridymite-type phosphor CaBaGa4O8:Bi3+
Source: Royal Society of Chemistry journal article supplement (doi:10.1039/d3dt01928d), 2023-01-01
Supplement: d3dt01928d1.pdf [file d3dt01928d1.pdf]

Supplementary information for

**Exclusive confinement of Bi<sup>3+</sup>-activators in the triangular prism enabling efficient and thermally stable green emission in tridymite-type phosphor CaBaGa<sub>4</sub>O<sub>8</sub>:Bi<sup>3+</sup>**

Jie Qin,<sup>a</sup> Pengfei Jiang,<sup>\*,a</sup> Rihong Cong and Tao Yang<sup>\*,a</sup>

<sup>a</sup> College of Chemistry and Chemical Engineering, Chongqing University, Chongqing 401331, China

\*Corresponding authors: pengfeijiang@cqu.edu.cn, taoyang@cqu.edu.cn.

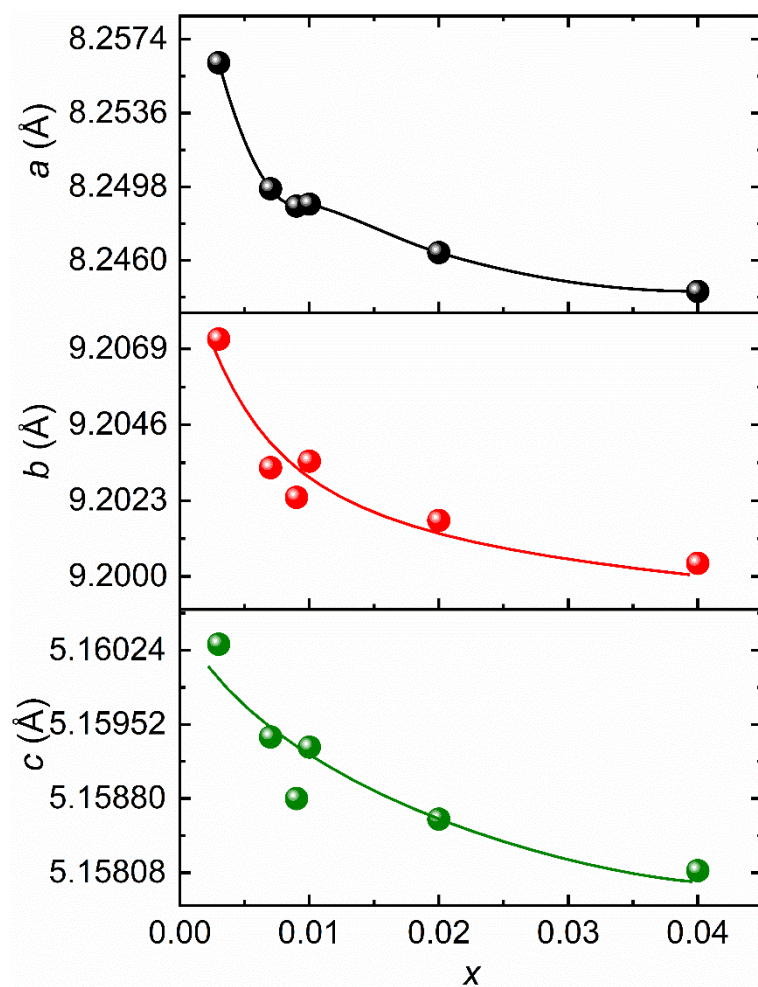

**Fig. S1** Plots of lattice parameters of  $\text{CaBaGa}_4\text{O}_8:x\text{Bi}^{3+}$  as a function of  $\text{Bi}^{3+}$ -content ( $x$ ).

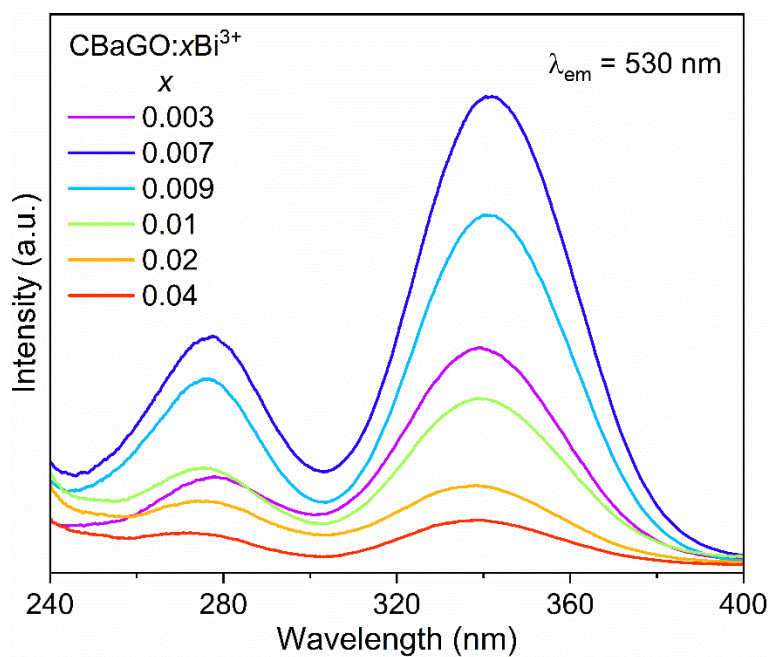

**Fig. S2** PLE spectra of  $\text{CaBaGa}_4\text{O}_8:x\text{Bi}^{3+}$  recorded with  $\lambda_{\text{em}} = 530$  nm.

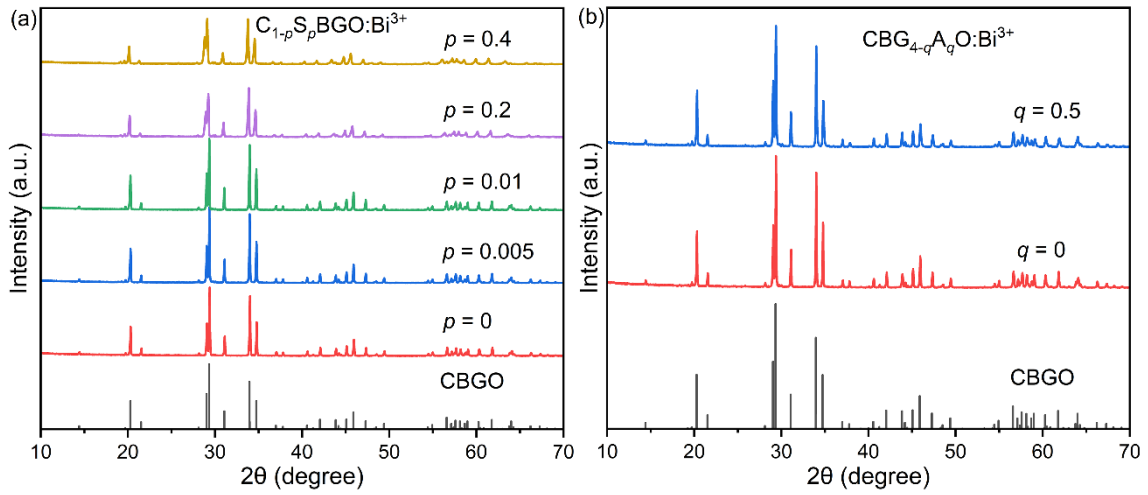

**Fig. S3** XRPD patterns for  $Ca_{1-p}Sr_pBaGa_4O_8:0.007Bi^{3+}$  ( $C_{1-p}S_pBGO:Bi^{3+}$ ) (a) and  $CaBaGa_{4-q}Al_qO_8:0.007Bi^{3+}$  ( $CBG_{4-q}A_qO:Bi^{3+}$ ) (b).

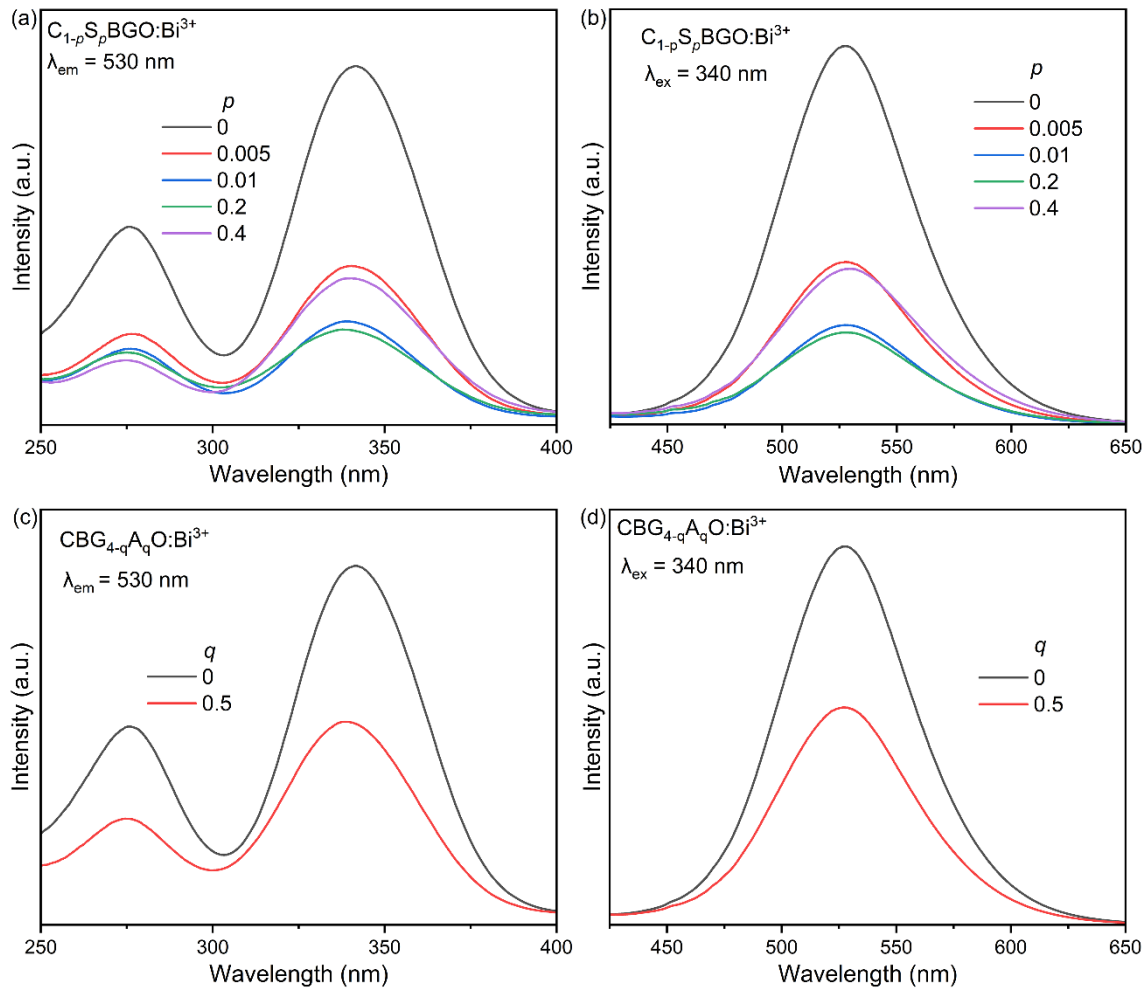

**Fig. S4** PLE and PL spectra for  $C_{1-p}S_pBGO:Bi^{3+}$  (a, b) and  $CBG_{4-q}A_qO:Bi^{3+}$  (c, d).

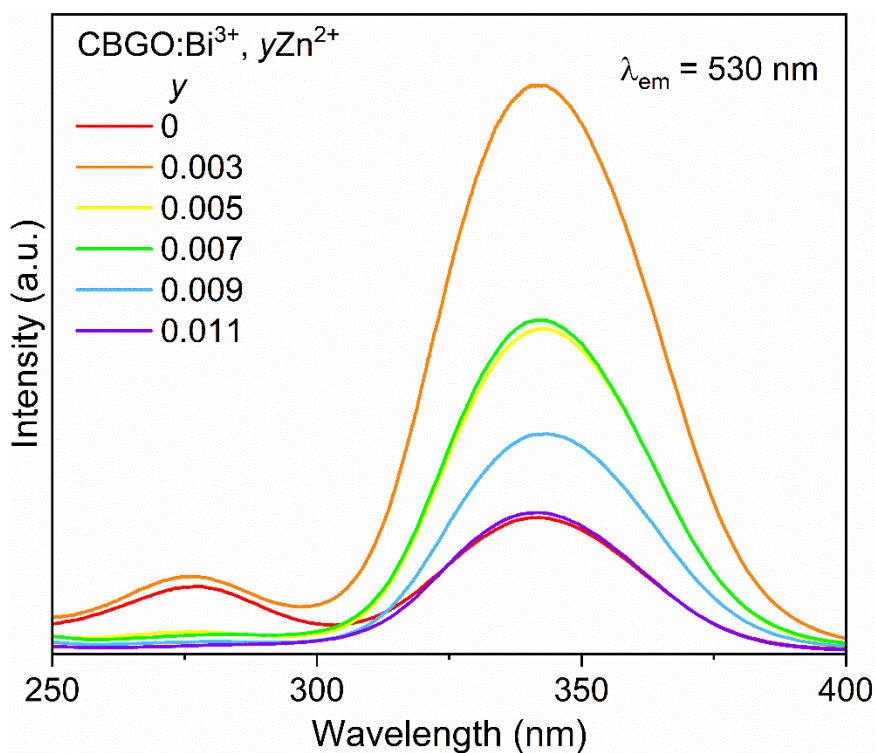

**Fig. S5** PLE spectra of  $\text{CBGO:Bi}^{3+}, y\text{Zn}^{2+}$  recorded with  $\lambda_{\text{em}} = 530 \text{ nm}$ .

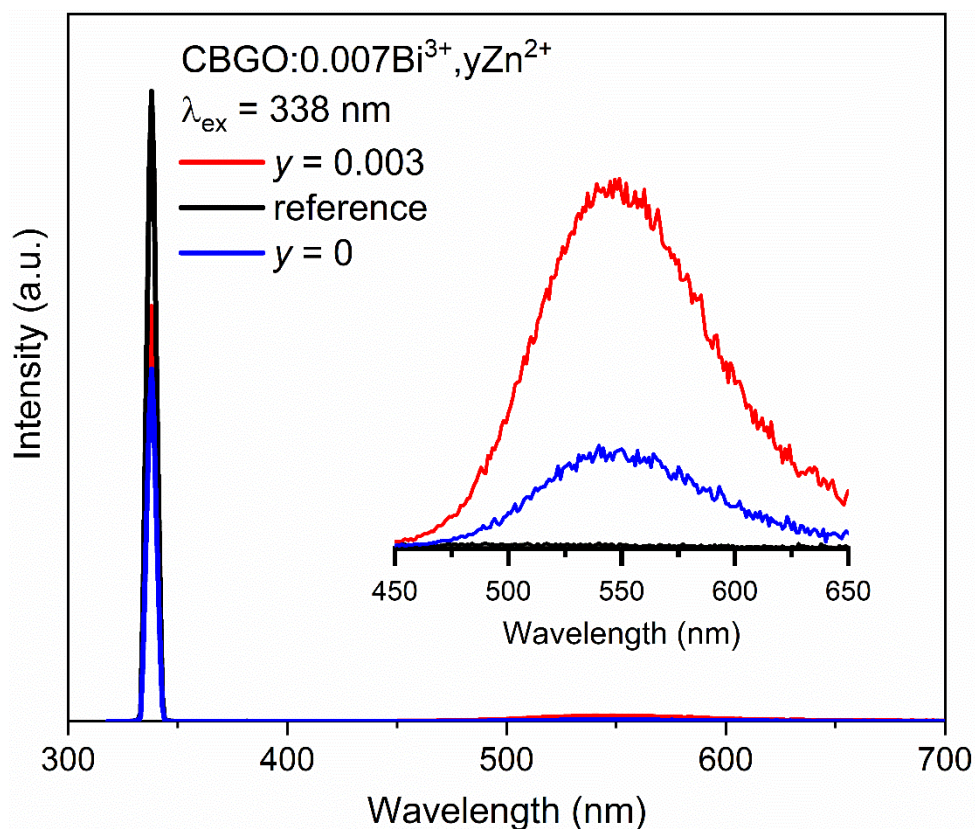

**Fig. S6** The optical spectra of  $\text{CBGO:0.007Bi}^{3+}, y\text{Zn}^{2+}$  with  $y = 0$  and  $0.003$  phosphors recorded by the quantum efficiency system under the excitation wavelength of  $340 \text{ nm}$ . The black lines in the figures represents the reflectance of the  $\text{BaSO}_4$  standard.

**Table S1** Atomic coordinates, site occupancy factor (*sof.*), isotropic thermal displacement factors for CaBaGa<sub>4</sub>O<sub>8</sub>:0.01Bi<sup>3+</sup> and CaBaGa<sub>4</sub>O<sub>8</sub>:0.007Bi<sup>3+</sup>, 0.003Zn<sup>2+</sup> obtained from Rietveld refinements against high-resolution Cu K<sub>α1</sub> XRPD data.

| CaBaGa <sub>4</sub> O <sub>8</sub> :0.01Bi <sup>3+</sup>                         |      |            |            |           |             |                        |
|----------------------------------------------------------------------------------|------|------------|------------|-----------|-------------|------------------------|
| Atom                                                                             | site | <i>x</i>   | <i>y</i>   | <i>z</i>  | <i>sof.</i> | Beq. (Å <sup>2</sup> ) |
| Ca                                                                               | 2a   | 0          | 0.5        | 0.4258(5) | 0.99        | 1.3(1)                 |
| Bi                                                                               | 2a   | 0          | 0.5        | 0.4258(5) | 0.01        | 1.3(1)                 |
| Ba                                                                               | 2a   | 0          | 0          | 0         | 1           | 0.98(3)                |
| Ga                                                                               | 8e   | 0.29176(9) | 0.16730(9) | 0.4516(3) | 1           | 0.64(2)                |
| O1                                                                               | 8e   | 0.2957(6)  | 0.1655(6)  | 0.0924(9) | 1           | 0.7(1)                 |
| O2                                                                               | 4d   | 0          | 0.3288(7)  | 0.077(1)  | 1           | 0.4(1)                 |
| O3                                                                               | 4c   | 0.1891(9)  | 0          | 0.566(1)  | 1           | 1.0(2)                 |
| CaBaGa <sub>4</sub> O <sub>8</sub> :0.007Bi <sup>3+</sup> ,0.003Zn <sup>2+</sup> |      |            |            |           |             |                        |
| Atom                                                                             | site | <i>x</i>   | <i>y</i>   | <i>z</i>  | <i>sof.</i> | Beq. (Å <sup>2</sup> ) |
| Ca                                                                               | 2a   | 0          | 0.5        | 0.4261(6) | 0.993       | 1.2(1)                 |
| Bi                                                                               | 2a   | 0          | 0.5        | 0.4261(6) | 0.007       | 1.2(1)                 |
| Ba                                                                               | 2a   | 0          | 0          | 0         | 1           | 0.97(3)                |
| Ga/Zn                                                                            | 8e   | 0.2919(1)  | 0.1671(1)  | 0.4519(3) | 0.997/0.003 | 0.68(3)                |
| O1                                                                               | 8e   | 0.2954(7)  | 0.1674(7)  | 0.092(1)  | 1           | 0.5(1)                 |
| O2                                                                               | 4d   | 0          | 0.3289(9)  | 0.078(2)  | 1           | 0.3(1)                 |
| O3                                                                               | 4c   | 0.191(1)   | 0          | 0.564(2)  | 1           | 0.7(2)                 |

**Table S2** Selected interatomic distances in  $\text{CaBaGa}_4\text{O}_8:0.01\text{Bi}^{3+}$  and  $\text{CaBaGa}_4\text{O}_8:0.007\text{Bi}^{3+},0.003\text{Zn}^{2+}$  obtained from Rietveld refinements against high-resolution  $\text{Cu K}\alpha_1$  XRPD data.

| $\text{CaBaGa}_4\text{O}_8:0.01\text{Bi}^{3+}$                      |            |           |            |           |            |
|---------------------------------------------------------------------|------------|-----------|------------|-----------|------------|
| bond                                                                | length (Å) | bond      | length (Å) | bond      | length (Å) |
| Ga–O2                                                               | 1.837(3)   | Ca–O2 × 2 | 2.393(7)   | Ba–O3 × 2 | 2.732(7)   |
| Ga–O1                                                               | 1.849(5)   | Ca–O1 × 4 | 2.430(5)   | Ba–O1 × 4 | 2.917(5)   |
| Ga–O1                                                               | 1.854(5)   |           |            | Ba–O2 × 4 | 3.053(6)   |
| Ga–O3                                                               | 1.854(4)   |           |            | Ba–O3 × 4 | 3.309(7)   |
| $\text{CaBaGa}_4\text{O}_8:0.007\text{Bi}^{3+},0.003\text{Zn}^{2+}$ |            |           |            |           |            |
| bond                                                                | length (Å) | bond      | length (Å) | bond      | length (Å) |
| Ga–O2                                                               | 1.835(6)   | Ca–O2 × 2 | 2.389(8)   | Ba–O3 × 2 | 2.749(9)   |
| Ga–O1                                                               | 1.837(3)   | Ca–O1 × 4 | 2.442(6)   | Ba–O1 × 4 | 2.923(6)   |
| Ga–O1                                                               | 1.857(6)   |           |            | Ba–O2 × 4 | 3.055(8)   |
| Ga–O3                                                               | 1.842(5)   |           |            | Ba–O3 × 2 | 3.309(9)   |
